# Supplementary material for: Attachment towards the Owner Is Associated with Spontaneous Sleep EEG Parameters in Family Dogs
Source: MDPI journal article supplement (doi:10.3390/ani12070895), 2022-03-31
Supplement: s1 [file s1]

# Attachment towards the Owner Is Associated with Spontaneous Sleep EEG Parameters in Family Dogs

Cecília Carreiro <sup>1,2,\*</sup>, Vivien Reicher <sup>1,2,3</sup>, Anna Kis <sup>2,4</sup> and Márta Gácsi <sup>2,3</sup>

<sup>1</sup> Doctoral School of Biology, Institute of Biology, ELTE Eötvös Loránd University, 1117 Budapest, Hungary; vivien.reicher@gmail.com

<sup>2</sup> Department of Ethology, Institute of Biology, ELTE Eötvös Loránd University, 1117 Budapest, Hungary; vargane.kis.anna@tk.mta.hu (A.K.); marta.gacsi@gmail.com (M.G.)

<sup>3</sup> MTA-ELTE Comparative Ethology Research Group, 1117 Budapest, Hungary

<sup>4</sup> Institute of Cognitive Neuroscience and Psychology, Research Centre for Natural Sciences, 1117 Budapest, Hungary

\* Correspondence: ceciliacarreiro@gmail.com

**Table S1.** Dogs' demographic data. All information was provided by the owners, except for the standard adult weight (calculated based on the American Kennel Club database; <https://www.akc.org/>). In the case of mix breed dogs, the weight is the information provided by the owners. Training status may involve no training supervised by a trainer (none), basic obedience (basic) or trainings such as agility, dummy training, service work or scent work (specific). Some dogs had more than one type of specific training and the information was organized into three general types of training status.

| Subject | Breed                              | Age at the EEG (Months) | Sex    | Gender Status | Training Status | Standard Adult Weight (kg) |
|---------|------------------------------------|-------------------------|--------|---------------|-----------------|----------------------------|
| Ginny   | Nova Scotia duck tolling retriever | 2.4                     | female | intact        | specific        | 19.1                       |
| Kesu    | border terrier                     | 3.3                     | female | intact        | specific        | 5.7                        |
| Zeno    | border collie                      | 3.63                    | male   | intact        | basic           | 19                         |
| Kosza   | tervueren                          | 3.8                     | male   | intact        | basic           | 29                         |
| Keeva   | rough collie                       | 3.9                     | female | intact        | none            | 22.5                       |
| Lotti   | golden retriever                   | 4.6                     | female | intact        | basic           | 27                         |
| Szille  | golden retriever                   | 5.3                     | female | intact        | none            | 27                         |
| Rozi    | labrador retriever                 | 5.8                     | female | intact        | none            | 28.1                       |
| Fuge    | mix                                | 5.9                     | female | neutered      | basic           | 15                         |
| Pesto   | boston terrier                     | 6.7                     | female | neutered      | basic           | 9.3                        |
| Vackor  | golden retriever                   | 6.8                     | male   | intact        | none            | 31.5                       |
| Tango   | golden retriever                   | 6.9                     | male   | intact        | specific        | 31.5                       |

|        |                                   |      |        |          |          |      |
|--------|-----------------------------------|------|--------|----------|----------|------|
| Pax    | cocker spaniel                    | 7.1  | female | intact   | basic    | 12   |
| Lulu   | mix                               | 7.3  | female | neutered | none     | 11   |
| Zafi   | small munsterlander               | 7.3  | female | intact   | specific | 24   |
| Puki   | American<br>staffordshire terrier | 7.6  | female | intact   | none     | 22.1 |
| Borka  | border collie                     | 7.6  | female | neutered | specific | 17   |
| Dimi   | golden retriever                  | 7.7  | male   | intact   | basic    | 31.5 |
| Byron  | golden retriever                  | 8.4  | male   | intact   | basic    | 31.5 |
| Akira  | labradoodle                       | 9.1  | female | neutered | specific | 26   |
| Rex    | miniature German<br>pinscher      | 10.2 | female | neutered | basic    | 4    |
| Szilka | tervueren                         | 11.6 | female | neutered | basic    | 25   |
| Rico   | border collie                     | 11.7 | male   | intact   | basic    | 19   |
| Misa   | mix                               | 12.2 | female | intact   | specific | 22   |
| Mokka  | border collie                     | 14.7 | female | neutered | specific | 17   |
| Luna   | Hungarian vizsla                  | 15.3 | female | neutered | basic    | 23   |
| Mirza  | springer spaniel                  | 16.6 | female | intact   | specific | 19.1 |
| Bingo  | mix                               | 21.8 | male   | intact   | specific | 32   |
| Barack | golden retriever                  | 22.2 | female | neutered | specific | 27   |
| Apacs  | Chinese crested                   | 22.4 | male   | neutered | specific | 6    |
| Nara   | mix                               | 27.8 | female | neutered | specific | 28   |
| Luca   | mix                               | 31.1 | female | neutered | basic    | 15   |
| Floyd  | golden retriever                  | 35.2 | male   | intact   | specific | 31.5 |
| Bran   | border collie                     | 61.5 | female | neutered | none     | 17   |
| Walter | golden retriever                  | 68   | male   | intact   | specific | 31.5 |
| Nia    | border collie                     | 70.6 | female | intact   | specific | 17   |
| Joey   | Australian shepherd               | 73.9 | male   | neutered | specific | 22   |
| Rohan  | border collie                     | 84.4 | female | neutered | basic    | 17   |

|        |                  |       |        |          |          |      |
|--------|------------------|-------|--------|----------|----------|------|
| Monty  | border collie    | 97.1  | male   | neutered | none     | 17   |
| Alma   | mix              | 102.6 | female | neutered | basic    | 22   |
| Barney | golden retriever | 104.9 | male   | intact   | basic    | 31.5 |
| Mini   | mix              | 117.9 | female | neutered | specific | 18   |

Note: although differences in brain electrophysiology during sleep has been found related to sexual hormones in dogs (intact vs. neutered females) [1], we did not include gender status in our analysis due to its overlap with age. In our sample size, neutered dogs up to 8 months old corresponded to only 9.5%, while this number increased to 36% of older dogs. Also, breed size has shown differences in brain electrophysiology along cortex maturation, however, we did not consider specifically the breeds for two reasons. First, our sample size had only 4 small breed dogs (e.g., under 10 kg), no giant breeds and our data had no outliers, as observed in [2] for giant breeds. Second, to circumvent measurement error due to the variability among the breeds head musculature and skull shape and thickness, dog EEG data were analyzed using not absolute, but relative EEG power [3] and breed did not need to be used as a separated factor.

**Table S2.** Means and standard deviations of the variables assessed in dogs tested first on SST (n=19) or first on EEG (n=23). No effect of the order of the tests was found.

| Variable                                 | SST First           | EEG First           |
|------------------------------------------|---------------------|---------------------|
| <b>Attachment scores</b>                 | M ± SD: 5.84 ± 2.21 | M ± SD: 6.30 ± 2.62 |
| <b>Drowsiness duration (%)</b>           | M ± SD: 19.9 ± 9.51 | M ± SD: 21.4 ± 10.5 |
| <b>NREM duration (%)</b>                 | M ± SD: 34.9 ± 15.2 | M ± SD: 37.3 ± 14.6 |
| <b>REM duration (%)</b>                  | M ± SD: 11.4 ± 8.88 | M ± SD: 8.10 ± 5.69 |
| <b>Alpha power (log)</b>                 | M ± SD: 0.27 ± 0.15 | M ± SD: 0.27 ± 0.14 |
| <b>Alpha-Delta anticorrelation (log)</b> | M ± SD: 0.16 ± 0.10 | M ± SD: 0.19 ± 0.13 |

## References

1. Iotchev, I.B.; Kis, A.; Turcsán, B.; Tejeda Fernández de Lara, D.R.; Reicher, V.; Kubinyi, E. Age-Related Differences and Sexual Dimorphism in Canine Sleep Spindles. *Sci. Rep.* **2019**, *9*, 1–11. <https://doi.org/10.1038/s41598-019-46434-y>.
2. Reicher, V.; Bunford, N.; Kis, A.; Carreiro, C.; Csibra, B.; Kratz, L.; Gácsi, M. Developmental Features of Sleep Electrophysiology in Family Dogs. *Sci. Rep.* **2021**, *11*, 22760. <https://doi.org/10.1038/s41598-021-02117-1>.
3. Kis, A.; Szakadát, S.; Kovács, E.; Gácsi, M.; Simor, P.; Gombos, F.; Topál, J.; Miklósi, Á.; Bódizs, R. Development of a Non-Invasive Polysomnography Technique for Dogs (*Canis Familiaris*). *Physiol. Behav.* **2014**, *130*, 149–156. <https://doi.org/10.1016/j.physbeh.2014.04.004>.
